# Supplementary material for: A Magnetic Nanoparticle-Doped Photopolymer for Holographic Recording
Source: MDPI journal article supplement (doi:10.3390/polym14091858), 2022-04-30
Supplement: s1 [file s1]

# A Magnetic Nanoparticle-Doped Photopolymer for Holographic Recording

Muhammad Irfan, Suzanne Martin, Muhannad Ahmed Obeidi, Scott Miller <sup>3</sup>, Frank Kuster, Dermot Brabazon and Izabela Naydenova

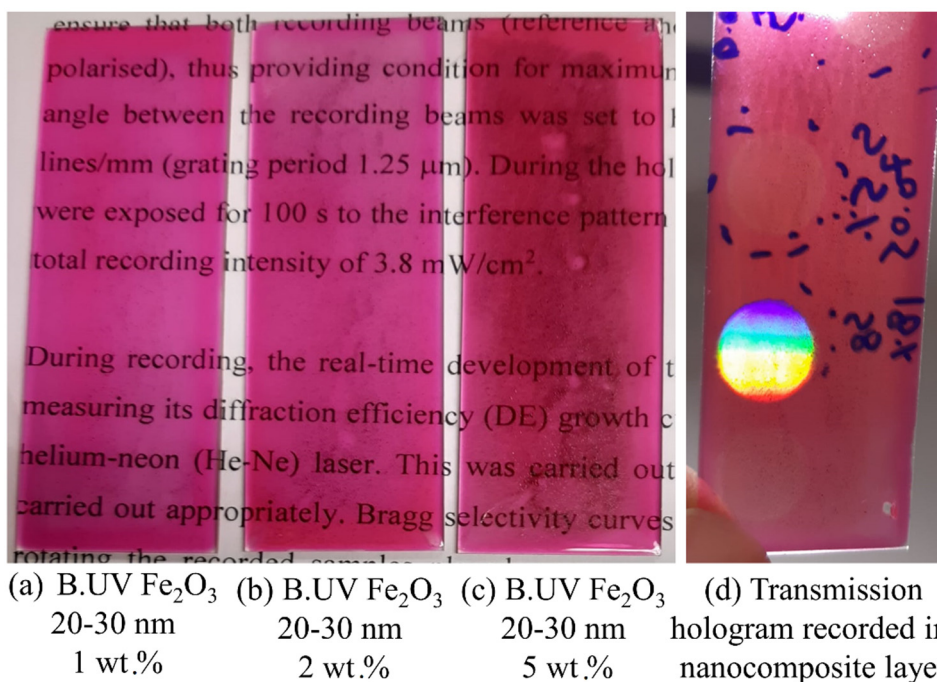

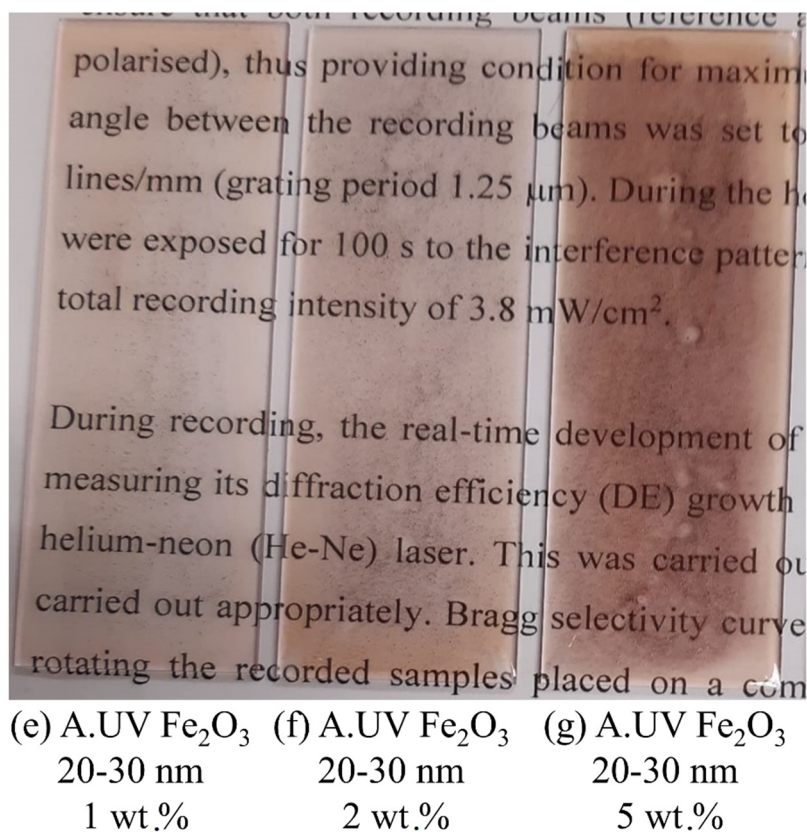

**Figure S1.** Physical pictures of the photosensitive magnetic nanocomposite layers having MNPs  $\text{Fe}_2\text{O}_3$ -Alpha 20–30 nm before UV exposure (a) 1 wt.%, (b) 2 wt.%, (c) 5 wt.%, (d) transmission hologram recorded in the magnetic nanocomposite layer and (e) 1 wt.%, (f) 2 wt.%, (g) 5 wt.% are after UV exposure. Layers were exposed for 100 s in Dymax UV-curing system (model ECE-200) and UV intensity of 60 mW/cm<sup>2</sup>.

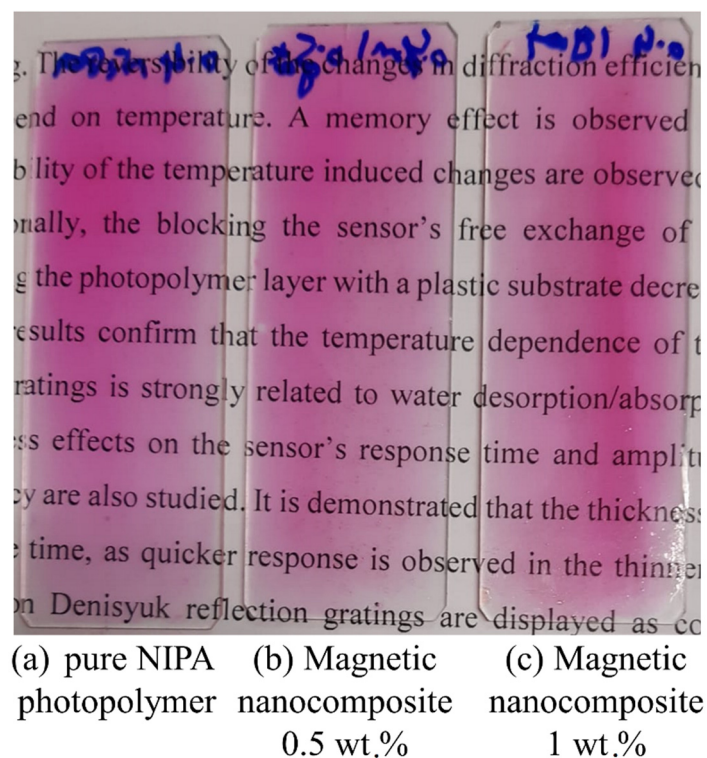

**Figure S2.** Physical pictures of the layers used in recording Denisjuk reflection holograms. (a) Pure NIPA photopolymer, magnetic nanocomposites having (b) 0.5 wt.%, (c) 1 wt.% of  $\text{Fe}_2\text{O}_3$  Alpha 20–30 nm.

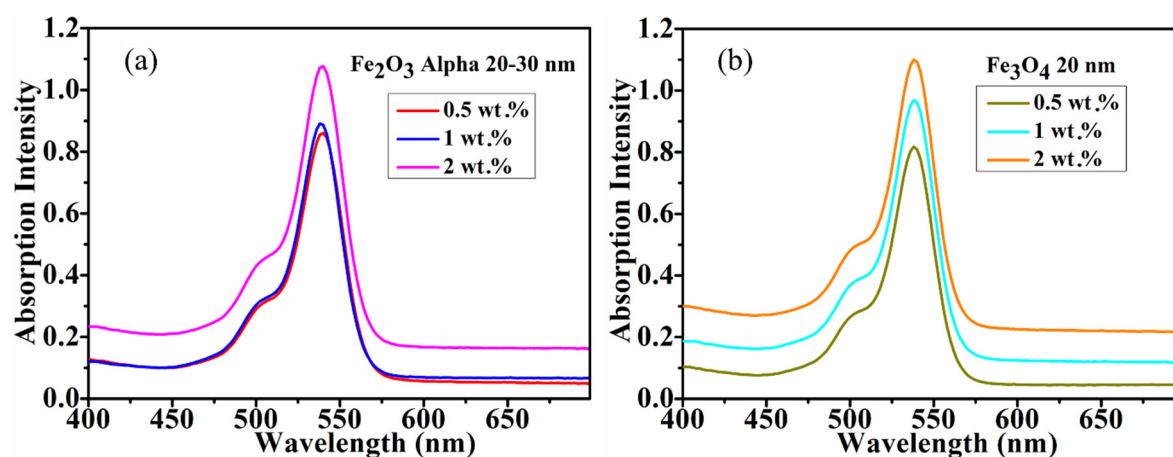

**Figure S3.** UV-Vis extinction (scattering plus absorption) spectrum of solid layers of photopolymer samples doped with a)  $\text{Fe}_2\text{O}_3$  and b)  $\text{Fe}_3\text{O}_4$  nanoparticles.

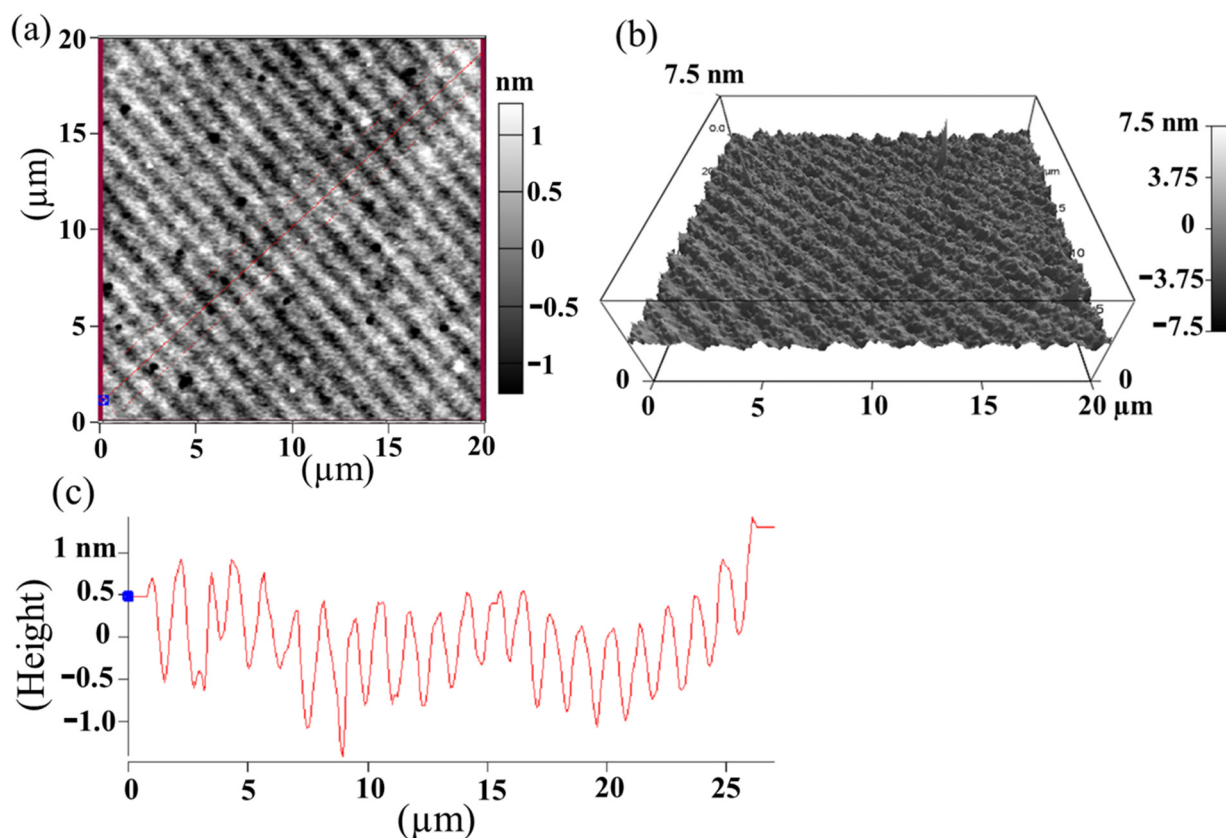

**Figure S4.** Morphology of the transmission holographic gratings studied by atomic force microscopy (AFM); the gratings were recorded in magnetic nanocomposite layer having MNPs  $\text{Fe}_2\text{O}_3$ -Alpha 20–30 nm. The grating period obtained is about 1.25  $\mu\text{m}$ , matching the grating period value for the recording spatial frequency of approximately 800 lines/mm used in transmission holographic recording.
